# Supplementary material
Source: bioRxiv or medRxiv preprint supplement (https://www.biorxiv.org/highwire/filestream/74307/field_highwire_adjunct_files/1/136911-2.pdf)

RNAi treatment

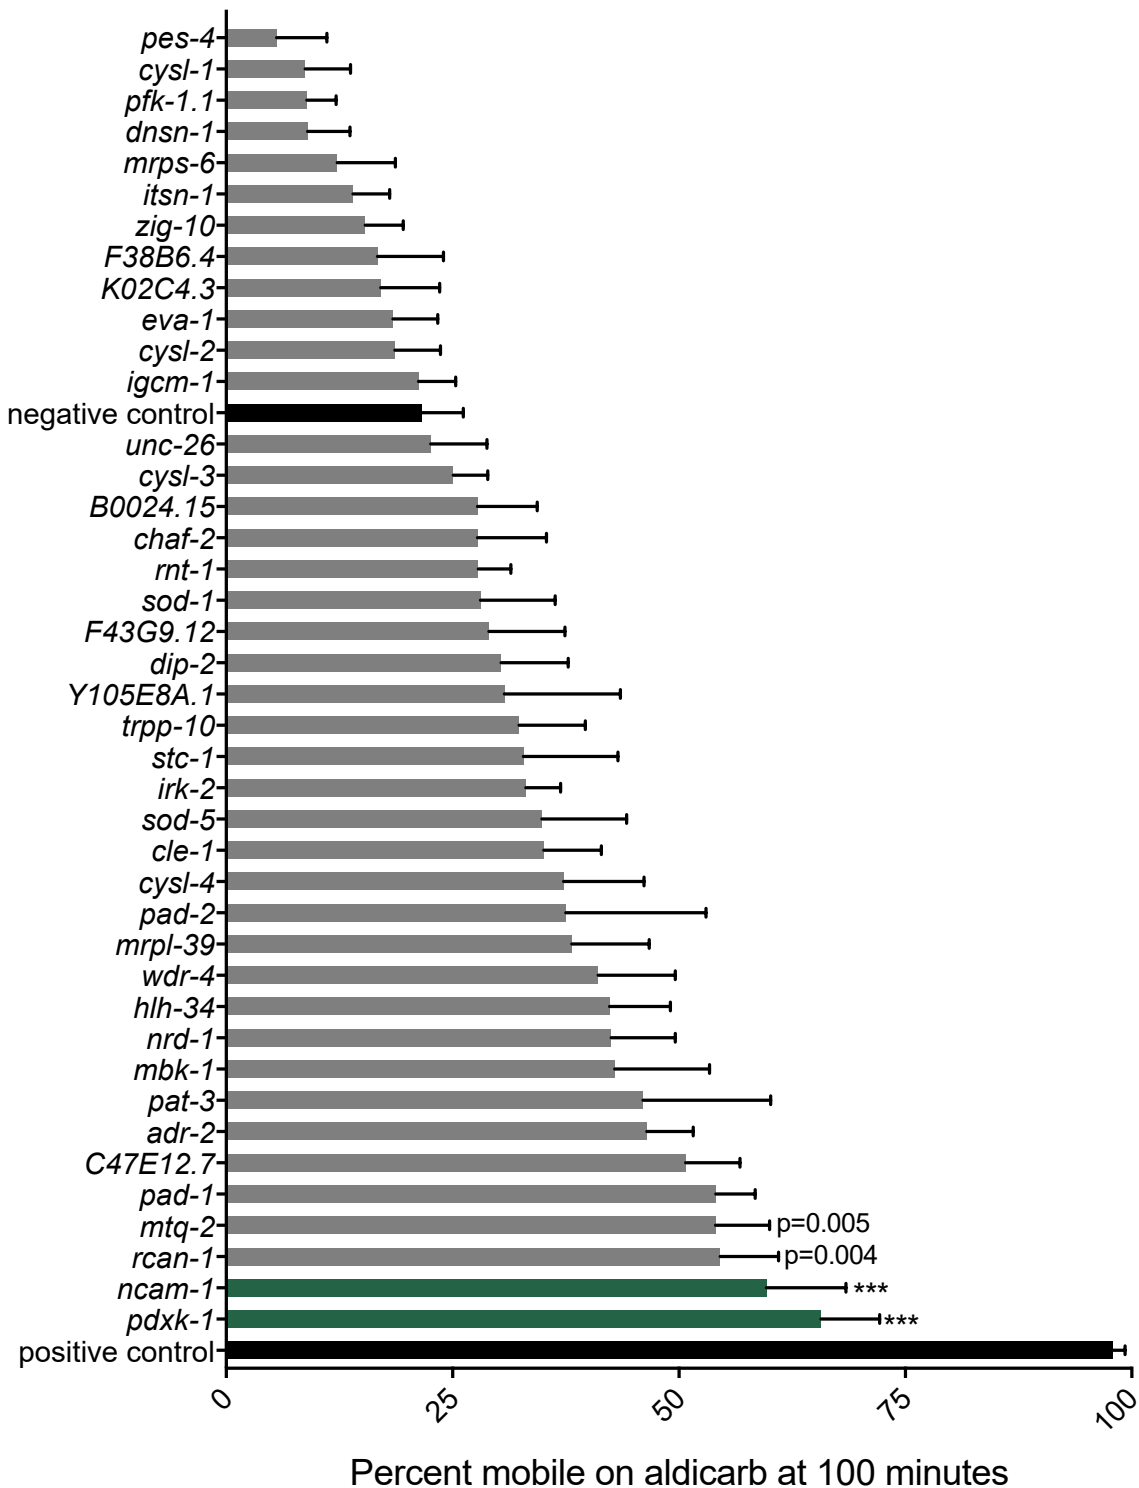

Supplement: Supplementary file [file 136911-2.pdf]
